# Supplementary material
Source: PubMed Central journal article supplement (PMC2673137)

Table S1

| Vaccinia gene (WR strain) | Protein topology <sup>1</sup>                  | Evidence for translation <sup>2,46</sup>                                      | Full length (amino acids) | Signal peptide (Sig)/transmembrane domain <sup>3</sup> | Primers <sup>4</sup>                                                                   | Restriction endonuclease sites | Final protein insert (amino acids) <sup>5</sup> |
|---------------------------|------------------------------------------------|-------------------------------------------------------------------------------|---------------------------|--------------------------------------------------------|----------------------------------------------------------------------------------------|--------------------------------|-------------------------------------------------|
| F12L                      | IEV (E) <sup>6</sup> ;<br>Cytosol-oriented (E) | Mut <sup>6</sup>                                                              | 635                       |                                                        | tagttaagcttgccaccatggACAGGGTACAAATCTTGATGA<br>tggaggcggccgcgTACCATCTGACTCATGGATT       | <i>HindIII/NotI</i>            | 4-633                                           |
| F15L <sup>7</sup>         | Cytosolic/viral membrane assembly (I)          |                                                                               | 147                       |                                                        | tagttaagcttgccaccatgGAAATTTTTAATGTAGAAGAATTGA<br>tggaggcggccgcgCTATTTTCGAATTTAGGCTTCC  | <i>HindIII/NotI</i>            | 2-146                                           |
| G4L                       | Cytosol/IMV surface (I) <sup>8</sup>           | MS <sup>9</sup>                                                               | 124                       |                                                        | tagttaagcttgccaccatggcgcAAGAACGTAAGTATTTCG<br>ttggaggcggccgcgctGTAACAGGTGGCCAACTC      | <i>HindIII/NotI</i>            | 2-123                                           |
| L1R                       | IMV surface (E) <sup>10</sup>                  | Ab <sup>10</sup> ; MS <sup>9</sup>                                            | 250                       | tm: 182-204                                            | tagttaagcttgccaccatggCGGGCAAGCATAACAGCGA<br>tggaggcggccgcgTACCAGCAACTTGTTTAGGTG        | <i>HindIII/NotI</i>            | 4-182                                           |
| L4R                       | nucleoprotein core (E) <sup>12</sup>           | Seq <sup>11</sup> ; F <sup>12</sup> ;<br>MS <sup>9</sup>                      | 251                       |                                                        | tagttaagcttgccaccatggTACTGCTAGAAAACCTCATCG<br>tggaggcggccgcgCATCCTTTGTCCGAATATCTGT     | <i>HindIII/NotI</i>            | 4-251                                           |
| J5L                       | IMV surface (I)                                | Mut <sup>13</sup> ; MS <sup>9</sup>                                           | 133                       | tm: 110-132                                            | tagttaagcttgccaccatggACGAACAAATTTATGCATTCT<br>tggaggcggccgcgCTCTAATTTCTGATTAGATAGC     | <i>HindIII/NotI</i>            | 3-109                                           |
| H3L                       | IMV surface (E) <sup>15</sup>                  | Ab <sup>14</sup> ; Mut <sup>15</sup> ;<br>Seq <sup>11</sup> ; MS <sup>9</sup> | 324                       | tm: 283-305                                            | tagttaagcttgccaccatggCGGGCAAAAACCTCTGTTATT<br>tggaggcggccgcgctGAAATCAGTGGAGTAGTAAACG   | <i>HindIII/NotI</i>            | 4-281                                           |
| D6R                       | nucleoprotein core (E) <sup>16</sup>           | Ab <sup>17</sup> ; Mut <sup>16</sup> ;<br>MS <sup>9</sup>                     | 637                       | tm: 41-63                                              | tagttaagcttgccaccatggcgcAGATTTAAAAAGGTTTACATTCTA<br>tggaggcggccgcgCTGGAGAAGATACCACGTTA | <i>HindIII/NotI</i>            | 64-637                                          |
| D8L                       | IMV surface (E) <sup>18</sup>                  | Seq <sup>11</sup> ; MS <sup>9</sup>                                           | 304                       | tm: 275-294                                            | tagttaagcttgccaccatggcgcCCGCAACAATATCTCTCTATT<br>tggaggcggccgcgctTTCTCTTCGATATATTTTGAT | <i>HindIII/NotI</i>            | 2-274                                           |
| D13L                      | IMV inner surface (E) <sup>19</sup>            | F <sup>19</sup> ; Ab <sup>19</sup> ; MS <sup>9</sup>                          | 551                       |                                                        | tagttggtaccgccaccatggcGCATCGGTGGGATGACTC<br>tggaggcggccgcgctTTATCTCCATAATCTTGGTAA      | <i>KpnI/NotI</i>               | 10-549                                          |
| A4L                       | nucleoprotein core (E) <sup>20</sup>           | Ab <sup>20</sup> ; MS <sup>9</sup>                                            | 281                       |                                                        | tagttaagcttgccaccatggcgcTTCTTTAACAAGTTCTCACAGG<br>tggaggcggccgcgctAATCGTTCAAACCTTTGACT | <i>HindIII/NotI</i>            | 2-281                                           |
| A11R                      | Non-structural assembly (E) <sup>21</sup>      | Ab <sup>21</sup> ; Mut <sup>21</sup> ;<br>MS <sup>9</sup>                     | 318                       | tm: 241-259; 293-312                                   | tagttaagcttgccaccatggcgcCCAGTGACGGATATACAAA<br>tggaggcggccgcgTTCTACTTTCTGTGATATTGTTT   | <i>HindIII/NotI</i>            | 2-240                                           |
| A12L                      | nucleoprotein core (E) <sup>22</sup>           | Seq <sup>11</sup> ; MS <sup>9</sup>                                           | 192                       |                                                        | tagttaagcttgccaccatggcgcAAAAATTTAGCCGTTAGAAGC<br>tggaggcggccgcgctTACATTTCCATATCCAGACAA | <i>HindIII/NotI</i>            | 2-192                                           |
| A27L                      | IMV surface (E) <sup>23</sup>                  | Ab <sup>24</sup> ; Mut <sup>23</sup> ;<br>Seq <sup>11</sup> ; MS <sup>9</sup> | 110                       |                                                        | tagttaagcttgccaccatggcgcTTTTCCCCGGAGATGA<br>tggaggcggccgcgCATATGGGCGCCGTCAGTC          | <i>HindIII/NotI</i>            | 5-110                                           |
| A33R                      | EEV surface                                    | Ab <sup>26</sup> ; Mut <sup>27</sup> ;                                        | 185                       | tm: 34-56                                              | tagttaagcttgccaccatggGCCTAAATCAATGCATGTCT                                              | <i>HindIII/NotI</i>            | 58-183                                          |

1  
2  
3  
4  
5  
6  
7  
8  
9  
10  
11  
12  
13  
14  
15  
16  
17  
18  
19  
20  
21  
22  
23  
24  
25  
26  
27  
28  
29  
30  
31  
32  
33  
34  
35  
36  
37  
38  
39  
40  
41  
42  
43  
44  
45  
46  
47  
48  
49

|                    |                                         |                                                        |     |                                                                    |                                                                                           |                     |        |
|--------------------|-----------------------------------------|--------------------------------------------------------|-----|--------------------------------------------------------------------|-------------------------------------------------------------------------------------------|---------------------|--------|
|                    | (E) <sup>25</sup>                       |                                                        |     |                                                                    | tggagggcggccgcgctGTTTTAACACAAAAAATACTTTCTA                                                |                     |        |
| A36R               | IEV (not EEV) surface (E) <sup>28</sup> | F <sup>29</sup> ; Mut <sup>29</sup>                    | 221 | tm: 5-24                                                           | tagttaagcttgccaccatggcgAGGAAAAAGATACGTACTGTCTATAA<br>tggagggcggccgcgATGATACGACCGATGATTCTA | <i>HindIII/NotI</i> | 26-219 |
| A38L               | EEV surface (I) <sup>30</sup>           | Ab <sup>31</sup> ; F <sup>31</sup> ; Mut <sup>31</sup> | 277 | Sig: 1-21<br>tm: 125-147; 154-176;<br>186-208; 215-237;<br>247-269 | tagttaagcttgccaccatggCTACAAAGACTATAGAGTATACAGCA<br>tggagggcggccgcgTTTGTAATCATTAAACCAATTA  | <i>HindIII/NotI</i> | 20-124 |
| A39R <sup>32</sup> | secreted (I) <sup>33</sup>              | Ab <sup>33</sup> ; Mut <sup>33</sup>                   | 295 | tm: 4-21; 28-50                                                    | tagttaagcttgccaccatggGTATCGAATGGCATAAGTTTG<br>tggagggcggccgcgGAATAGGTACATAATGCGGACT       | <i>HindIII/NotI</i> | 53-294 |
| A40R               | Cell surface (E) <sup>34, 35</sup>      | Ab <sup>35</sup> ; Mut <sup>35</sup>                   | 159 | tm: 7-29                                                           | tagttaagcttgccaccatggcgTTAAAAGTTGTAGAACGTAATAG<br>tggagggcggccgcgCAGTGTAACACGAATGCAGTTT   | <i>HindIII/NotI</i> | 30-158 |
| A56R               | EEV surface (E) <sup>36</sup>           | Ab <sup>37</sup> ; Mut <sup>37</sup>                   | 314 | Sig: 1-17<br>tm: 279-301                                           | tagttaagcttgccaccatggcgCCTTTTCTCAGACATCTAAA<br>tggagggcggccgcgCTTCTACAAAGTCCTTGGTTTT      | <i>HindIII/NotI</i> | 18-278 |
| B5R                | EEV surface (E) <sup>38, 39</sup>       | Ab <sup>38,39</sup>                                    | 317 | Sig: 1-20<br>tm: 280-302                                           | tagttaagcttgccaccatggcgCCCACTATGAATAACGCTAAA<br>tggagggcggccgcgctTGATAAGTTGCTTCTAACGATT   | <i>HindIII/NotI</i> | 24-278 |
| B19R               | Secreted (I)                            | Mut <sup>40</sup>                                      | 351 | Sig: 1-24                                                          | tagttaagcttgccaccatggCGATCGAAAATGAAATCACAGAA<br>tggagggcggccgcgCTACTGTAGTTGTAAGGGTTTTT    | <i>HindIII/NotI</i> | 26-348 |

**Initially tested but later excluded from the array**

|      |                                                                          |                                         |     |           |                                                                                         |                     |        |
|------|--------------------------------------------------------------------------|-----------------------------------------|-----|-----------|-----------------------------------------------------------------------------------------|---------------------|--------|
| F13L | IEV surface (E) <sup>41</sup> ; EEV inner membrane (E) <sup>41, 42</sup> | Ab <sup>41</sup> ; Mut <sup>41</sup>    | 372 |           | tagttaagcttgccaccatggCTGCGGGAGCAAATGTA<br>tggagggcggccgcgGTGGCTAGATACCAATCTCT           | <i>HindIII/NotI</i> | 9-366  |
| A32L | Non-structural assembly (E) <sup>21</sup>                                | Ab <sup>21</sup> ; Mut <sup>43</sup>    | 270 | tm: 21-43 | tagttaagcttgccaccatggtaTTCTTGTTTACACCCGTTT<br>tggagggcggccgcgTTTTGACGACGATGATT          | <i>HindIII/NotI</i> | 44-270 |
| A34R | EEV <sup>43,44</sup>                                                     | Ab <sup>44</sup> ; Mut <sup>44,45</sup> | 168 | tm: 15-37 | tagttaagcttgccaccatggACAAAGAAGAACTGATGCCTA<br>tggagggcggccgcgctTTTTTAACACATAGTACAGATTGA | <i>HindIII/NotI</i> | 39-165 |

<sup>1</sup> Topology considered experimentally-demonstrated (E) based on indicated reference or indirect (I) based on bibliographic, domain and bioinformatic analysis.

<sup>2</sup> Evidence from vaccinia mutant analysis (Mut) or functional activity (F), from detection of virus-induced protein-specific antibodies (Ab), or from detection in purified IMV preparations by direct protein sequencing (Seq) or by mass spectroscopy analysis of tryptic digests (MS).

<sup>3</sup> Signal peptides and transmembrane domains predicted by the *Simple Modular Architecture Research Tool* (SMART) sequence analysis tool (Letunic I, Copley RR, Pils B, Pinkert S, Schultz J, Bork P. (2006) SMART 5: domains in the context of genomes and networks. *Nucleic Acids Res.* **34**:D257-60).

1  
2  
3  
4  
5  
6  
7 4 Forward and reverse primers for amplification from vaccinia WR genomic DNA. Capitalized sequence represents vaccinia-encoded region; lower case  
8 sequence is filler including restriction endonuclease site (italicized) and, for the forward primer, an optimal Kozak sequence incorporating a start codon  
9 (gccaccATGg).  
10 5 Representing domain inserted upstream of myc-His<sub>6</sub> tag encoded in pcDNA3.1 vector.  
11 6 van Eijl H, Hollinshead M, Rodger G, Zhang WH, Smith GL (2002) The vaccinia virus F12L protein is associated with intracellular enveloped virus particles  
12 and is required for their egress to the cell surface. *J. Gen. Virol* **83**: 195–207.  
13 7 Although the possible function and topological orientation of F15L has not yet been determined, it is included since its sequence is completely conserved  
14 amongst all orthopox viruses with no remotely similar mammalian or other eukaryotic homolog. It thus offers itself as a potential interesting antibody target.  
15 8 Senkevich TG, White CL, Weisberg A, Granek JA, Wolffe EJ, Koonin EV, Moss B (2002) Complete pathway for protein disulfide bond formation encoded  
16 by poxviruses. *Proc Natl Acad Sci USA* **99**: 6667-72.  
17 9 Resch W, Hixson KK, Moore RJ, Lipton MS, Moss B (2007) Protein composition of the vaccinia virus mature virion. *Virology* **358**: 233-47.  
18 10 Wolffe EJ, Vijaya S, Moss B (1995) A myristylated membrane protein encoded by the vaccinia virus L1R open reading frame is the target of potent  
19 neutralizing monoclonal antibodies. *Virology* **211**: 53-63.  
20 11 Takahashi T, Oie M, Ichihashi Y. (1994) N-terminal amino acid sequences of vaccinia virus structural proteins. *Virology* **202**: 844-52.  
21 12 Bayliss CD, Wilcock D, Smith GL (1996) Stimulation of vaccinia virion DNA helicase I8R, but not A18R, by a vaccinia core protein L4R, an ssDNA  
22 binding protein. *J. Gen. Virol.* **77**: 2827-31.  
23 13 Zajac P, Spohner D, Drillien R (1995) The vaccinia J5L open reading frame encodes a polypeptide expressed late during infection and required for viral  
24 multiplication. *Virus Res.* **37**: 163-73.  
25 14 Housawi *et al.* (1998) The reactivity of monoclonal antibodies against orf virus with other parapoxviruses and the identification of a 39kDa immunodominant  
26 protein. *Arch. Virol.* **143**: 2289-303.  
27 15 Lin CL, Chung CS, Heine HG, Chang W (2000) Vaccinia virus envelope H3L protein binds to cell surface heparin sulfate and is important for intracellular  
28 mature virion morphogenesis and virus infection *in vitro* and *in vivo*. *J. Virol.* **74**: 3353-65.  
29 16 Christen L, Higman MA, Niles EG (1992) Phenotypic characterization of three temperature-sensitive mutations in the vaccinia virus early gene transcription  
30 initiation factor. *J. Gen. Virol.* **73**: 3155-67.  
31 17 Gershon PD, Moss B (1990) Early transcription factor subunits are encoded by vaccinia virus late genes. *Proc Natl Acad Sci USA* **87**: 4401-5.  
32 18 Hsaio JC, Chung CS, Chang W (1999) Vaccinia virus envelope D8L protein binds to cell surface chondroitin sulfate and mediates the adsorption of  
33 intracellular mature virions to cells. *J. Virol.* **73**: 8750-61.  
34 19 Szajner P, Weisberg AS, Lebowitz J, Heuser J, Moss B (2005) External scaffold of spherical immature poxvirus particles is made of protein trimers, forming  
35 a honeycomb lattice. *J. Cell Biol.* **170**: 971-81.  
36 20 Cudmore S *et al.* (1996) A vaccinia core protein, p39, is membrane-associated. *J. Virol.* **70**: 6909-21.  
37 21 Resch W, Weisberg AS, Moss B (2005) Vaccinia virus nonstructural protein encoded by the A11R gene is required for formation of the virion membrane. *J.*  
38 *Virol.* **79**: 6598-609.  
39 22 Whitehead SS, Hruby DE (1994) Differential utilization of a conserved motif for the proteolytic maturation of vaccinia virus core proteins. *Virology* **200**:  
40 154-61.  
41 23 Sodeik B, Cudmore S, Ericsson M, Esteban M, Niles EG, Griffiths G (1995) Assembly of vaccinia virus: incorporation of p14 and p32 into the membrane of  
42 the intracellular mature virus. *J. Virol.* **69**: 3560-74.  
43  
44  
45  
46  
47  
48  
49

1  
2  
3  
4  
5  
6  
7  
8  
9  
10  
11  
12  
13  
14  
15  
16  
17  
18  
19  
20  
21  
22  
23  
24  
25  
26  
27  
28  
29  
30  
31  
32  
33  
34  
35  
36  
37  
38  
39  
40  
41  
42  
43  
44  
45  
46  
47  
48  
49

24 Gong SC, Lai CF, Esteban M (1990) Vaccinia virus induces cells fusion at acid pH and this activity is mediated by the N-terminus of the 14-kDa virus envelope protein. *Virology* **178**: 81-91.

25 Roper RL, Payne LG, Moss B (1996) Extracellular vaccinia virus envelope glycoprotein encoded by the A33R gene. *J. Virol.* **70**: 3753-62.

26 Galmiche MC, Goenaga J, Wittek R, Rindisbacher L (1999) Neutralizing and protective antibodies directed against vaccinia virus envelope antigens. *Virology* **254**: 71-80.

27 Gurt I, Abdalrhman I, Katz E (2006) Pathogenicity and immunogenicity in mice of vaccinia viruses mutated in the viral envelope proteins A33R and B5R. *Antiviral Res.* **69**: 158-64.

28 van Eijl H, Hollinshead M, Smith GL (2000) The vaccinia virus A36R protein is a type Ib membrane protein present on intracellular but not extracellular enveloped virus particles. *Virology* **271**: 26-36.

29 Ward BM, Weisberg AS, Moss B (2003) Mapping and functional analysis of interaction sites within the cytoplasmic domains of the vaccinia virus A33R and A36R envelope proteins. *J. Virol.* **77**: 4113-26.

30 Ref. 31 below addresses the topology of A38L, finding that the N-terminal hydrophilic region (amino acids 20-124 used here) is probably intraluminal with respect to the endoplasmic reticulum placing it appropriately both for expression on the EEV and on the plasma membrane with a structure and topology similar to that of CD47. Using an antibody developed against an N-terminal region linear peptide, no expression is found on EEV or IMV, although the authors caution that the antibody reagent may be weak.

31 Parkinson JE, Sanderson CM, Smith GL (1995) The vaccinia virus A38L gene product is a 33-kDa integral membrane glycoprotein. *Virology* **214**: 177-88.

32 A39R is a secreted semaphorin-like molecule in vaccinia strain Copenhagen but an integral membrane semaphorin-like protein (VACWR163) is genomically encoded in vaccinia strain WR.

33 Gardner JD, Tschärke DC, Reading PC, Smith GL (2001) Vaccinia virus semaphorin A39R is a 50–55 kDa secreted glycoprotein that affects the outcome of infection in a murine intradermal model. *J. Gen. Virol.* **82**: 2083-2093.

34 As for A38L(see note 29 above), immunoblotting with anti-A40R shows strong infected cell expression but no detected signal in purified IMV or EEV. Given the ER origin of the EEV membrane, however, some incorporation cannot be definitively excluded. Further, the strong expression at the infected cell surface may still lead to induction of a humoral immune response.

35 Wilcock D, Duncan SA, Traktman P, Zhang W-H, Smith GL (1999) The vaccinia virus A40R gene product is a non-structural, type II membrane glycoprotein that is expressed at the cell surface. *J. Gen. Virol.* **80**: 2137-48.

36 Payne LG, Norrby E (1976) *J. Gen. Virol.* **32**: 63-72.

37 Law M, Smith GL (2001) Antibody neutralization of the extracellular enveloped form of vaccinia virus. *Virology* **280**: 132-142.

38 Engelstad M, Howard ST, Smith GL (1992) A constitutively expressed vaccinia gene encodes a 42-kDa glycoprotein related to complement control factors that forms part of the extracellular virus envelope. *Virology* **188**: 801-10.

39 Isaacs SN, Wolffe EJ, Payne LG, Moss B (1992) Characterization of a vaccinia virus-encoded 42-kilodalton class I membrane glycoprotein component of the extracellular virus envelope. *J. Virol.* **66**: 7217-24.

40 Jackson SS *et al.* (2005) Role of genes that modulate host immune responses in the immunogenicity and pathogenicity of vaccinia virus. *J. Virol.* **79**: 6554-9.

41 Husain M, Weisberg A, Moss B (2003) Topology of epitope-tagged F13L protein, a major membrane component of extracellular vaccinia virions. *Virology* **308**: 233-42.

42 Payne L (1978) Polypeptide composition of extracellular enveloped vaccinia virus. *J. Virol.* **27**: 28-37.

43 Casseti MC, Merchlinsky M, Wolffe EJ, Weisberg AS, Moss B (1998) DNA packaging mutant: repression of the vaccinia virus A32 gene results in noninfectious, DNA-deficient, spherical, enveloped particles. *J. Virol.* **72**: 5769-80.

1  
2  
3  
4  
5  
6  
7  
8  
9  
10  
11  
12  
13  
14  
15  
16  
17  
18  
19  
20  
21  
22  
23  
24  
25  
26  
27  
28  
29  
30  
31  
32  
33  
34  
35  
36  
37  
38  
39  
40  
41  
42  
43  
44  
45  
46  
47  
48  
49

<sup>44</sup> Duncan SA, Smith GL (1992) Identification and characterization of an extracellular envelope glycoprotein affecting vaccinia virus egress. *J. Virol.* **66**: 1610-21.

<sup>45</sup> Earley AK, Chan WM, Ward BM (2008) The vaccinia virus B5 protein requires A34 for efficient intracellular trafficking from the endoplasmic reticulum to the site of wrapping and incorporation into progeny virions. *J. Virol.* **82**: 2161-9.

<sup>46</sup> A recent article using high-resolution reversed-phase nano-LC-MS/MS of purified IMV and EEV confidently identifies tryptic peptides derived from every protein used in our array except for A38L. Manes NP, Estep RD, Mottaz HM, Moore RJ, Clauss TRW, Monroe ME, Du X, Adkins JN, Wong SW, Smith RD (2008) Comparative proteomics of human monkeypox and vaccinia intracellular mature and extracellular enveloped virions. *J. Proteome Res.* **7**: 960-8

1  
2  
3  
4  
5  
6  
7  
8  
9  
10  
11  
12  
13  
14  
15  
16  
17  
18  
19  
20  
21  
22  
23  
24  
25  
26  
27  
28  
29  
30  
31  
32  
33  
34  
35  
36  
37  
38  
39  
40  
41  
42  
43  
44  
45  
46  
47  
48  
49

Figure S1

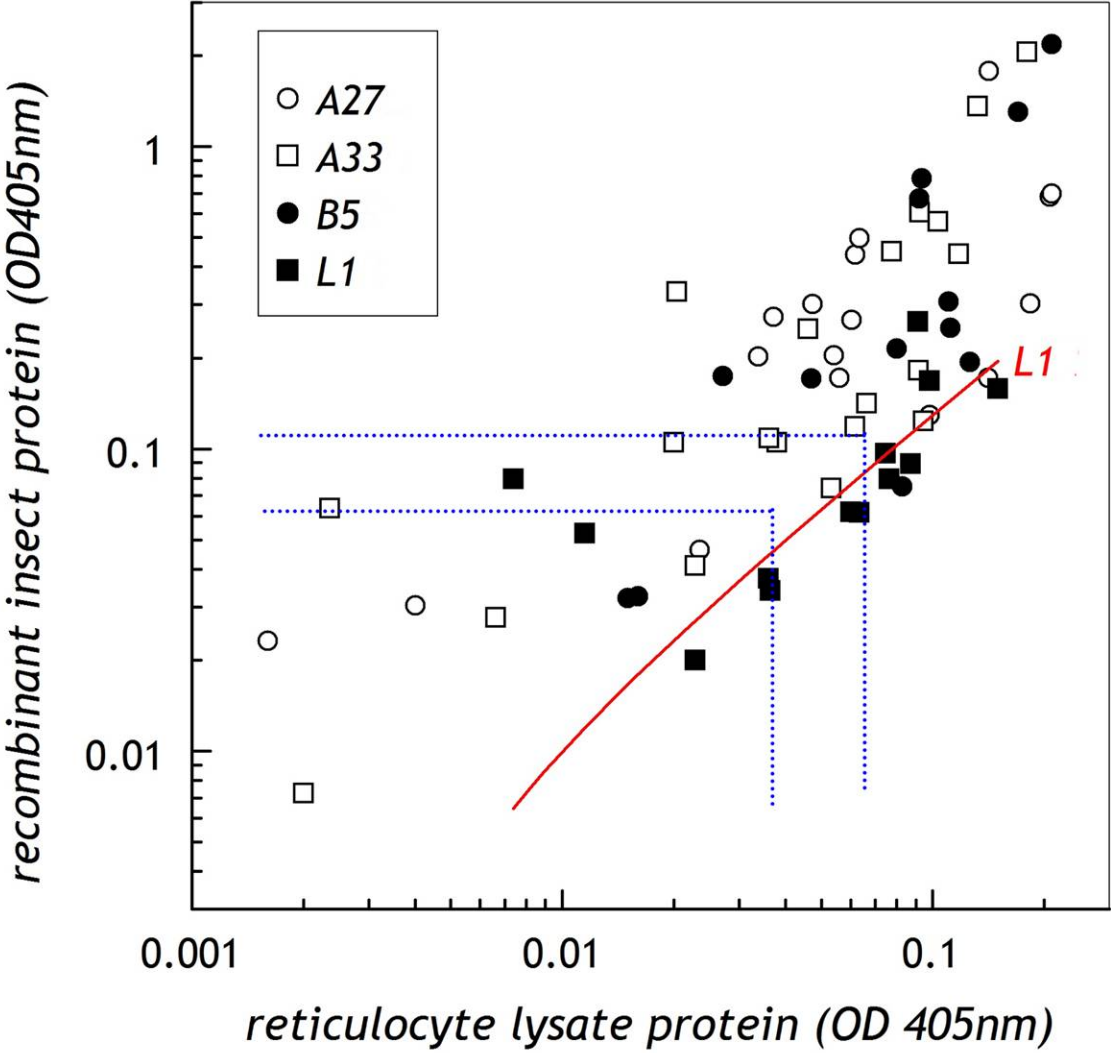

Figure S2

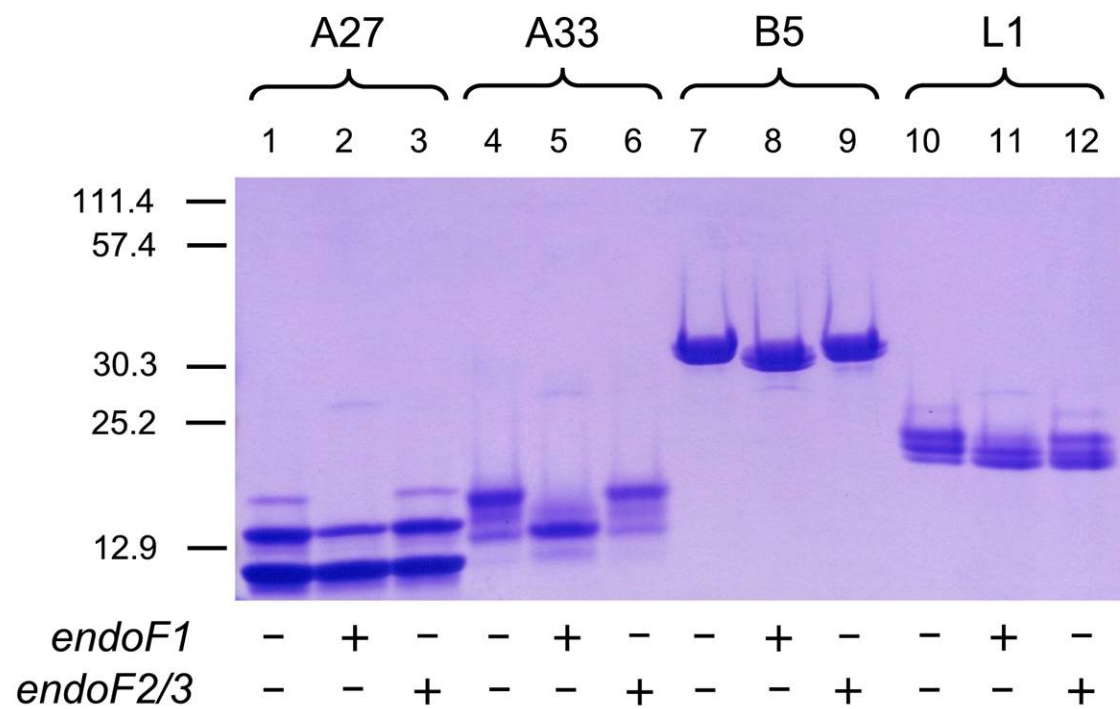



Figure S3

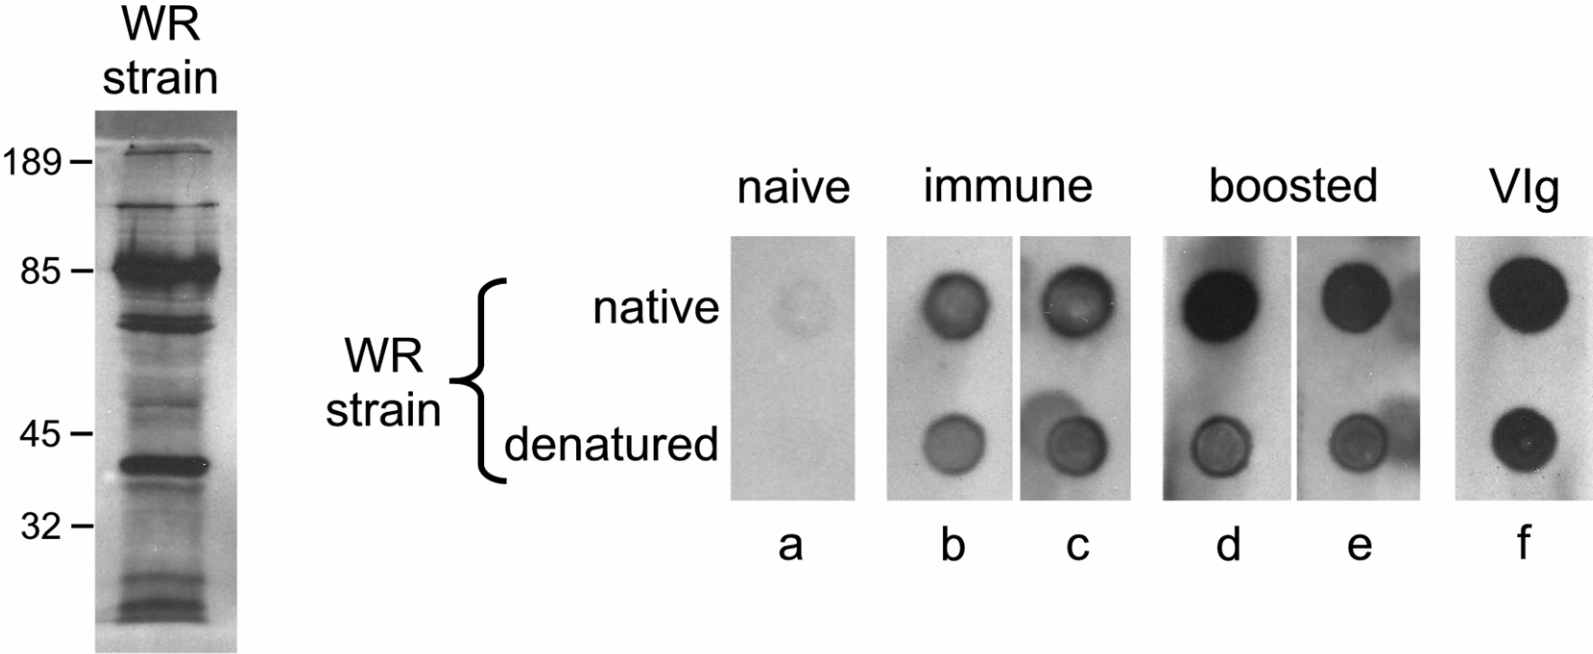

Supplement: NIHMS95768-supplement-01.pdf [file NIHMS95768-supplement-01.pdf]
